# Supplementary material
Source: PubMed Central journal article supplement (PMC2713503)
Supplement: NIHMS105976-supplement-1_si_001.pdf [file NIHMS105976-supplement-1_si_001.pdf]

## SUPPORTING INFORMATION

The relaxation procedure before production MD is explained in detail as follows:

- (1) 1000 steps of minimization using steepest descent method using a cutoff of 8.0 Å for truncation of nonbonded pairs while applying a harmonic restraint to all the backbone atoms of the enzyme with a force constant of 5.0 kcal/mol Å<sup>2</sup>.
- (2) 15 picoseconds of molecular dynamics with a timestep of 1 femtosecond at 300 K and constant pressure using periodic boundary conditions and Berendsen weak-coupling algorithm(1) with a temperature coupling time constant of 0.5 picoseconds and a pressure relaxation time of 0.5 picoseconds. The Particle Mesh Ewald Sum technique is used to calculate long range electrostatic interactions. Shake algorithm(2) is also used to constrain bonds involving hydrogen atoms. The constraints for the backbone atoms and the nonbonded cutoff value used in the 1<sup>st</sup> step are kept.
- (3) Three subsequent minimizations with the same procedure as in step 1 except decreasing the force constant for the backbone atoms to 2.0 kcal/mol Å<sup>2</sup>, 0.1 kcal/mol Å<sup>2</sup> and finally to 0, respectively.
- (4) 5 picoseconds of molecular dynamics with the same procedure as in step 2 except decreasing the restraint force constant to 1.0 kcal/ mol Å<sup>2</sup>.
- (5) 15 picoseconds of molecular dynamics with the same procedure as in step 2 except decreasing the restraint force constant to 0.5 kcal/ mol Å<sup>2</sup>.
- (6) 1 nanosecond of molecular dynamics with the same procedure as in step 2 except releasing the restraints and increasing the timestep to 2 femtoseconds.

1. Berendsen, H. J. C., Postma, J. P. M., Vangunsteren, W. F., Dinola, A., and Haak, J. R. (1984) Molecular-Dynamics with Coupling to an External Bath, *Journal of Chemical Physics* 81, 3684-3690.
2. Ryckaert, J.-P., Ciccotti, G., and Berendsen, H. J. C. (1977) Numerical integration of the cartesian equations of motion of a system with constraints: molecular dynamics of n-alkanes, *Journal of Computational Physics* 23, 327-341.

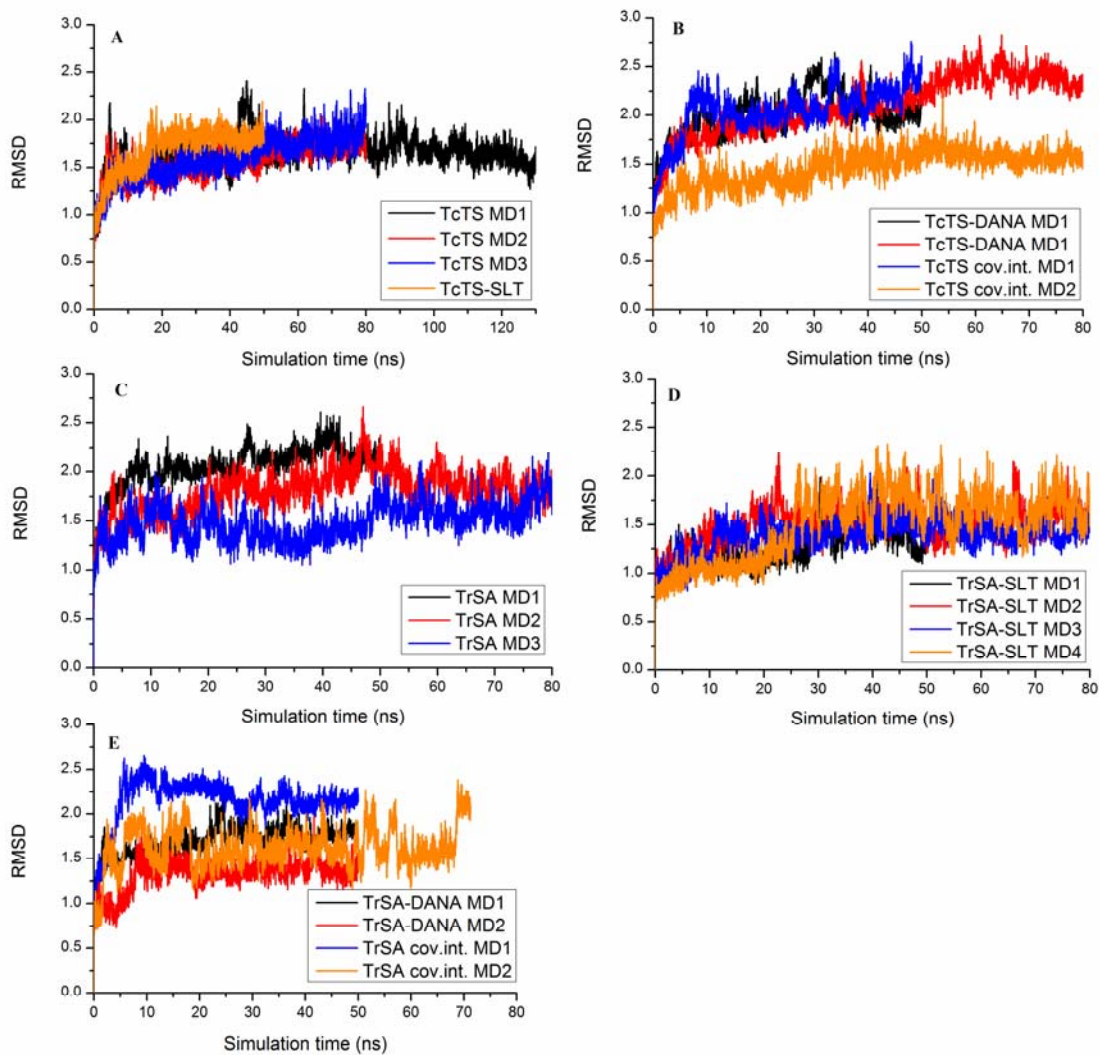

Figure S1. Root mean square deviations (RMSD) of  $C_{\alpha}$  atoms of the systems during MD simulations (in Å). A) apo form of TcTS and sialyl-lactose-bound TcTS B) DANA-bound TcTS and TcTS covalent intermediate C) apo form of TrSA D) Sialyl-lactose-bound TrSA E) DANA-bound TrSA and TrSA covalent intermediate.

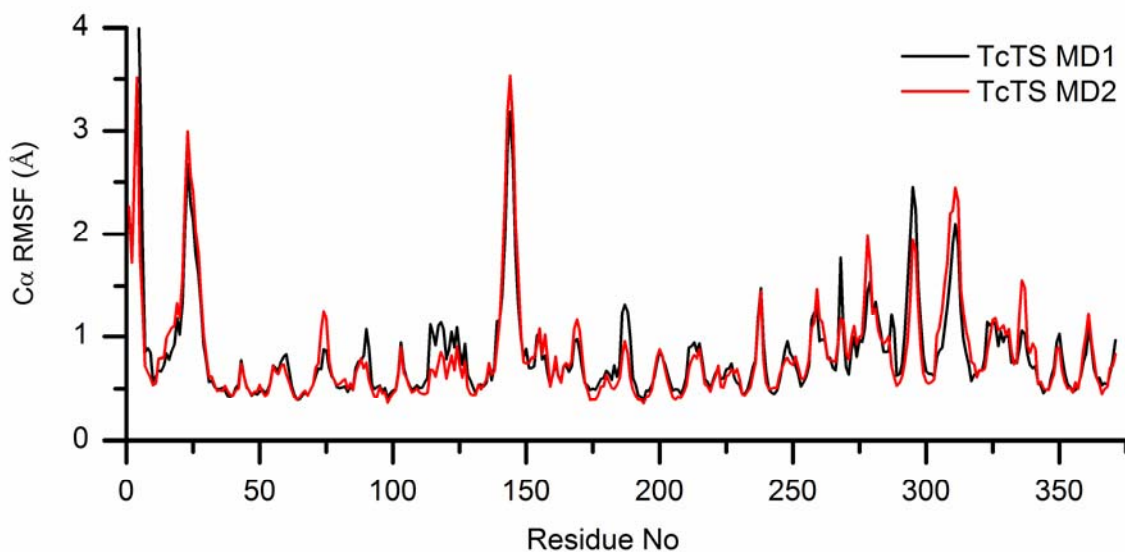

Figure S2. Mobilities of  $C_{\alpha}$  for each residue in apo TcTS MD simulations. RMSF is a measurement of deviation of a particle from a reference structure—average structure of

production run in our case—over time. RMSF is defined with  $RMSF = \sqrt{\frac{1}{t} \sum_{t_j=0}^{t_j=t} (x(t_j) - \bar{x})^2}$

where  $t$  is time and  $\bar{x}$  is the time-averaged position of the same particle. RMSF can be used as a measure of the mobility of a particle in a simulation and is related to experimental B-factors by the relationship given as:  $B\text{-factor} = 8\pi^2 (RMSF)^2$ .
